# Supplementary material for: Stabilization of peptides against proteolysis through disulfide-bridged conjugation with synthetic aromatics
Source: Royal Society of Chemistry journal article supplement (doi:10.1039/c6ob02786e), 2017-01-01
Supplement: c6ob02786e1.pdf [file c6ob02786e1.pdf]

**Electronic Supplementary Information for**  
**Stabilization of Peptides against Proteolysis through**  
**Disulfide-Bridged Conjugation with Synthetic Aromatics**

Yaqi Chen,<sup>†a</sup> Tao Li,<sup>†a</sup> Jianguo Li<sup>b,c</sup>, Shiyan Cheng,<sup>a</sup> Jinghui Wang,<sup>a</sup> Chandra  
Verma,<sup>c,d,e</sup> Yibing Zhao,<sup>a</sup> Chuanliu Wu<sup>\*a</sup>

<sup>a</sup> Department of Chemistry, College of Chemistry and Chemical Engineering, The MOE Key Laboratory of Spectrochemical Analysis and Instrumentation, State Key Laboratory of Physical Chemistry of Solid Surfaces, Collaborative Innovation Center of Chemistry for Energy Materials, Xiamen University, Xiamen, 361005, P.R. China.

<sup>b</sup> Singapore Eye Research Institute, 20 College Road, 169856, Singapore.

<sup>c</sup> Bioinformatics Institute (A\*STAR), 30 Biopolis Street, Matrix, 138671, Singapore.

<sup>d</sup> National University of Singapore, Department of Biological Sciences, Singapore.

<sup>e</sup> Nanyang Technological University, School of Biological Sciences, Singapore.

<sup>\*</sup>To whom correspondence should be addressed, Email: chlwu@xmu.edu.cn

---

## **Table of Contents**

**HPLC chromatograms and mass spectra of NDI-peptide conjugates (S1–S15)**

**Enzymatic digestion of free peptides (1–4) and their NDI conjugates (S16–S23)**

**CD Spectra of free peptides (1–4) and their NDI conjugates (S24–S27)**

**Enzymatic digestion of free peptides (5–8) and their NDI conjugates (S28–S44)**

**HPLC and mass spectrometry (MS) analysis of cleavage sites (S45–S48)**

**Data on HREMD simulations (S49 and S50)**

**CD Spectra of free peptides (5 and 6) and their NDI conjugates (S51 and S52)**

**Fluorescence spectra of peptides (S53)**

**Reduction kinetics of NDI-peptide conjugates in redox buffers (S54 and S55)**

**To confirm the reduction of disulfide bonds of 6-NDI-6 in cells (S56)**

**Bioactivity of peptide and NDI-peptide conjugates in 10% serum (S57)**

---

## HPLC chromatograms and mass spectra of NDI-peptide conjugates

**1=NDI:**

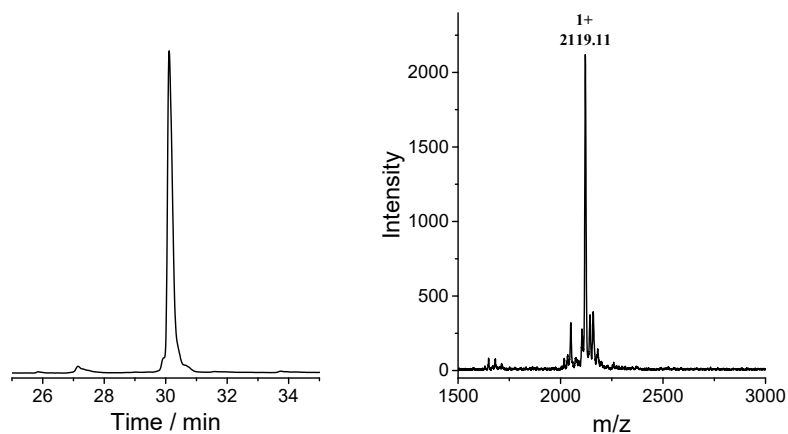

**Figure S1.** Analytical HPLC chromatogram and mass spectrum data of the purified **1=NDI**; m/z calculated: 2117.37, m/z found: 2119.11  $[M+H]^+$ .

**2=NDI:**

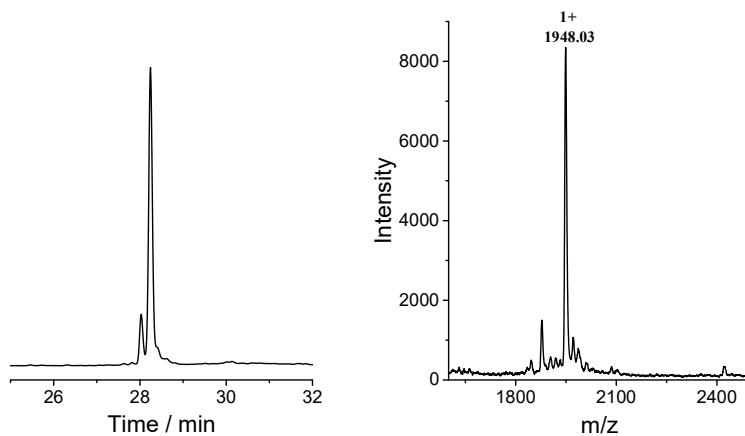

**Figure S2.** Analytical HPLC chromatogram and mass spectrum data of the purified **2=NDI**; m/z calculated: 1946.17, m/z found: 1948.03  $[M+H]^+$ .

**3=NDI:**

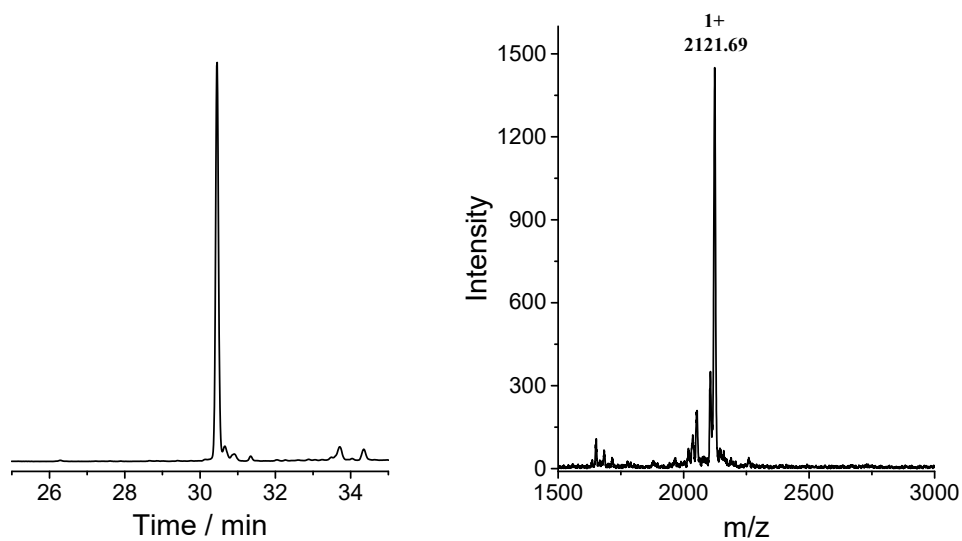

**Figure S3.** Analytical HPLC chromatogram and mass spectrum data of the purified **3=NDI**; m/z calculated: 2118.35, m/z found: 2121.69  $[M+H]^+$ .

**4=NDI:**

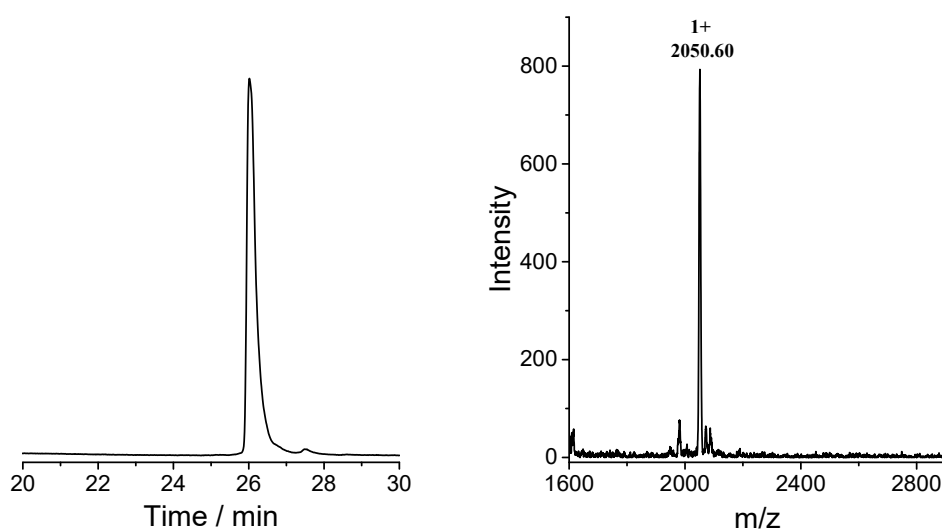

**Figure S4.** Analytical HPLC chromatogram and mass spectrum data of the purified **4=NDI**; m/z calculated: 2047.31, m/z found: 2050.60  $[M+H]^+$ .

**5-NDI:**

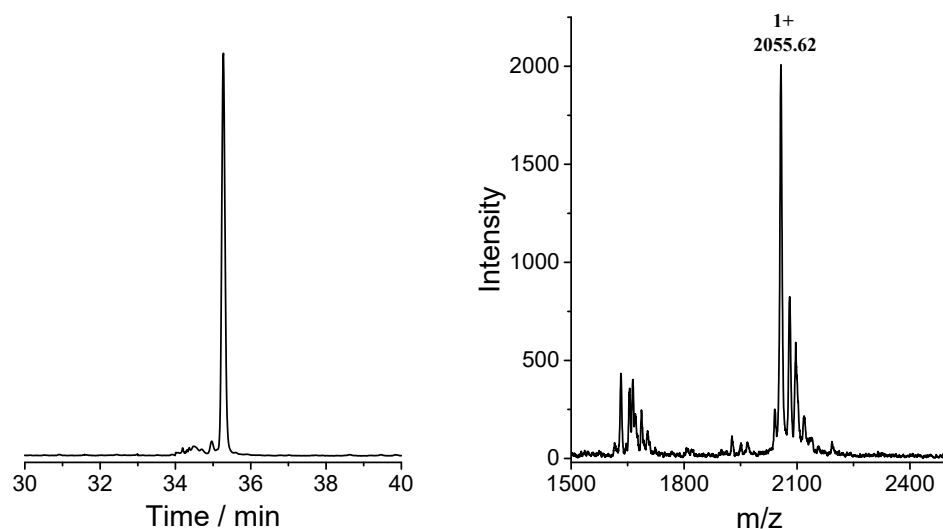

**Figure S5.** Analytical HPLC chromatogram and mass spectrum data of the purified 5-NDI; m/z calculated: 2055.23, m/z found: 2055.62  $[M+H]^+$ .

**5-NDI-5:**

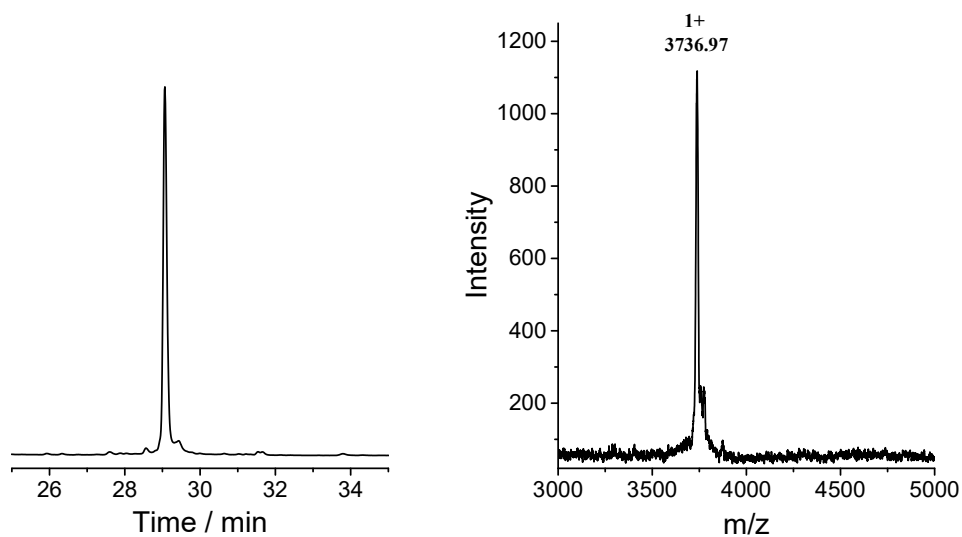

**Figure S6.** Analytical HPLC chromatogram and mass spectrum data of the purified 5-NDI-5; m/z calculated: 3732.04, m/z found: 3736.97  $[M+H]^+$ .

**6-NDI:**

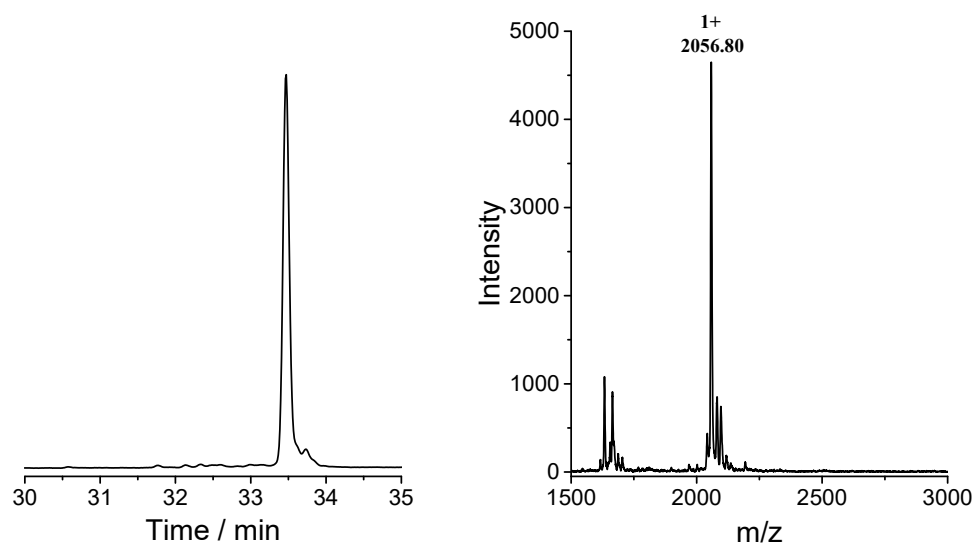

**Figure S7.** Analytical HPLC chromatogram and mass spectrum data of the purified 6-NDI; m/z calculated: 2055.23, m/z found: 2056.80  $[M+H]^+$ .

**6-NDI-6:**

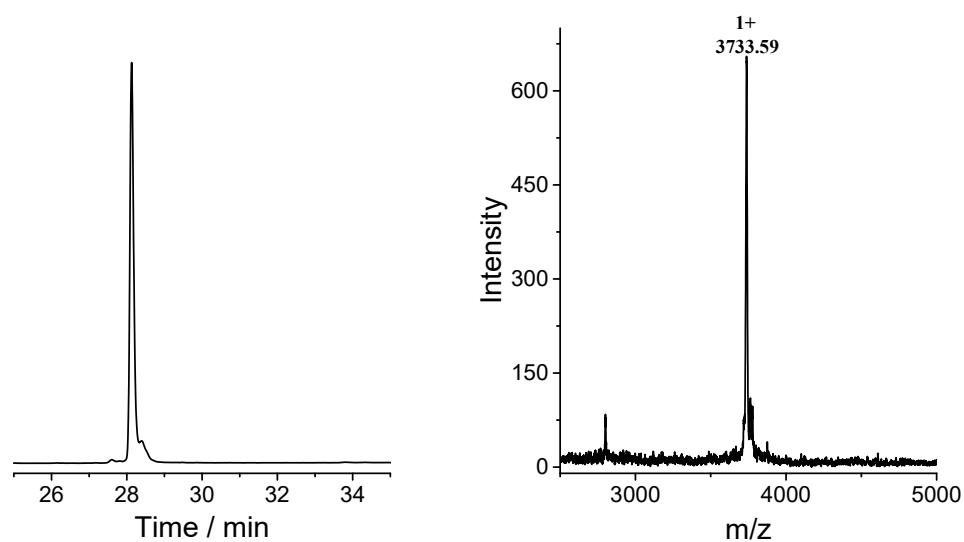

**Figure S8.** Analytical HPLC chromatogram and mass spectrum data of the purified 6-NDI-6; m/z calculated: 3732.04, m/z found: 3733.59  $[M+H]^+$ .

7-NDI:

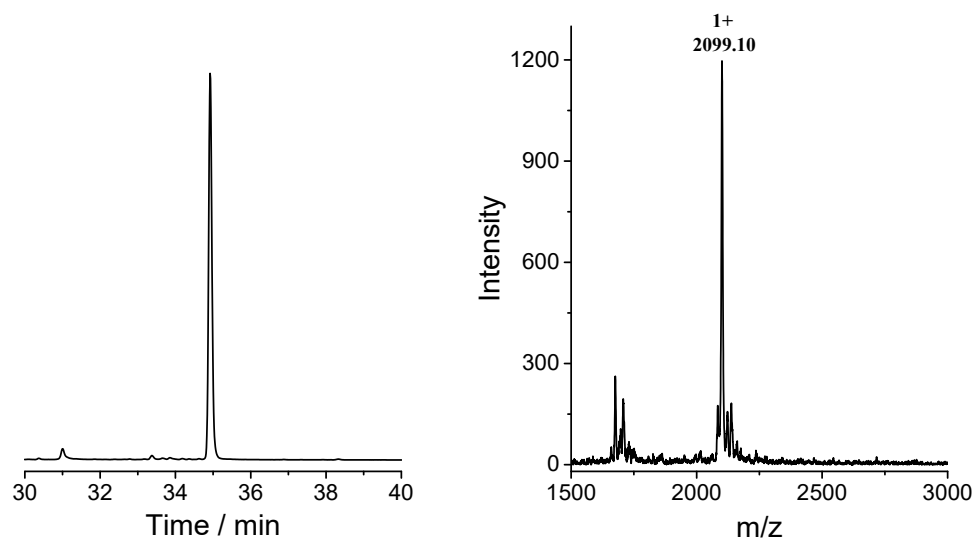

**Figure S9.** Analytical HPLC chromatogram and mass spectrum data of the purified 7-NDI; m/z calculated: 2097.28, m/z found: 2099.10  $[M+H]^+$ .

7-NDI-7:

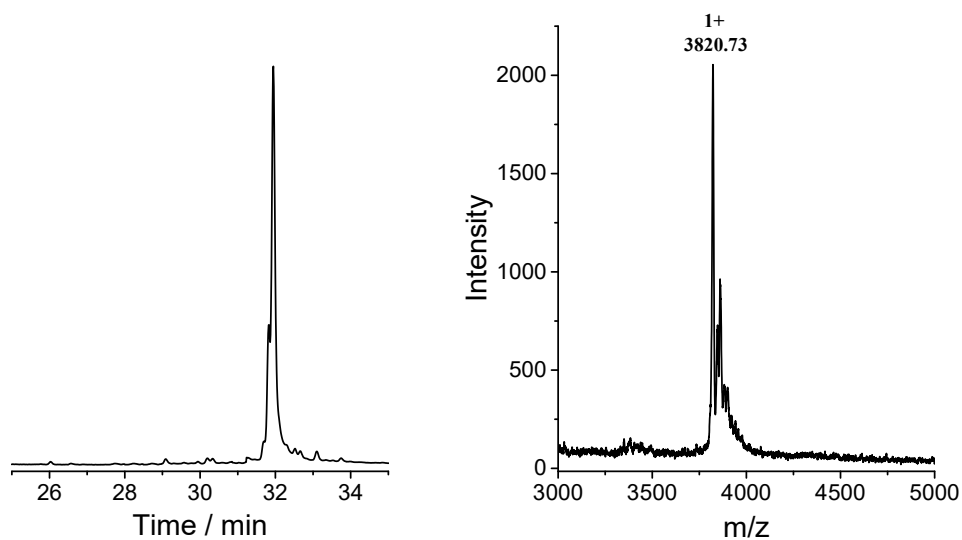

**Figure S10.** Analytical HPLC chromatogram and mass spectrum data of the purified 7-NDI-7; m/z calculated: 3816.14, m/z found: 3820.73  $[M+H]^+$ .

8-NDI:

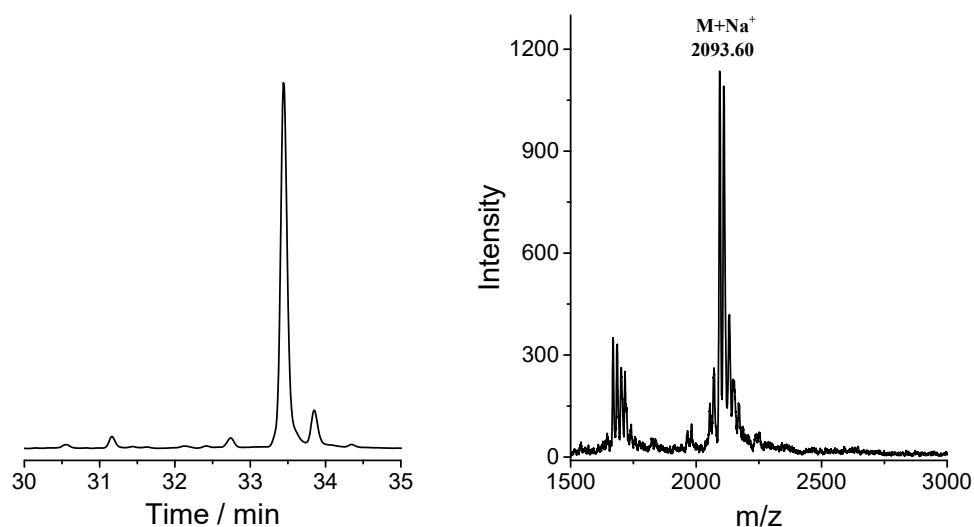

**Figure S11.** Analytical HPLC chromatogram and mass spectrum data of the purified 8-NDI; m/z calculated: 2070.25, m/z found: 2093.60 [M+Na]<sup>+</sup>.

8-NDI-8:

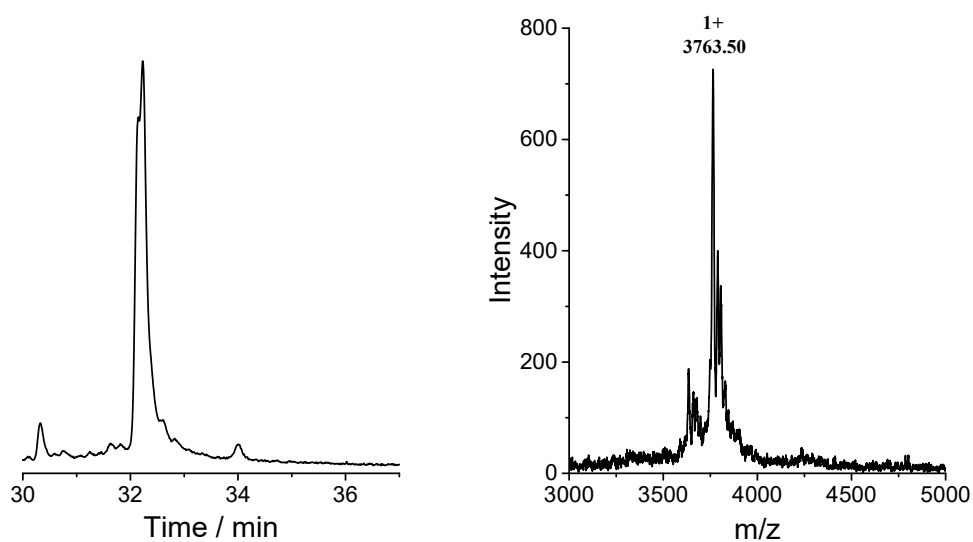

**Figure S12.** Analytical HPLC chromatogram and mass spectrum data of the purified 8-NDI-8; m/z calculated: 3762.08, m/z found: 3763.50 [M+H]<sup>+</sup>.



6-6

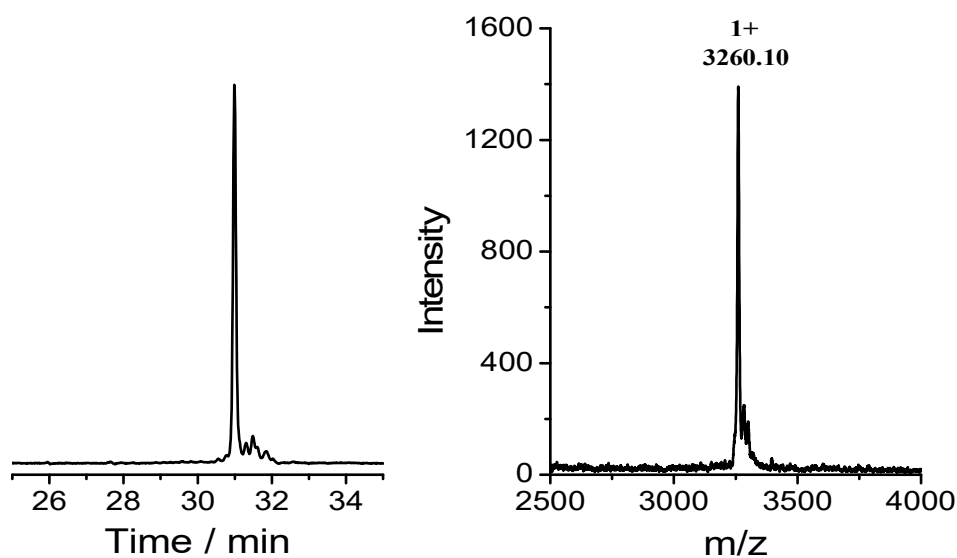

**Figure S13.** Analytical HPLC chromatogram and mass spectrum data of the purified **6-6**; m/z calculated: 3259.60, m/z found: 3260.10  $[M+H]^+$ .

6-Bme-6

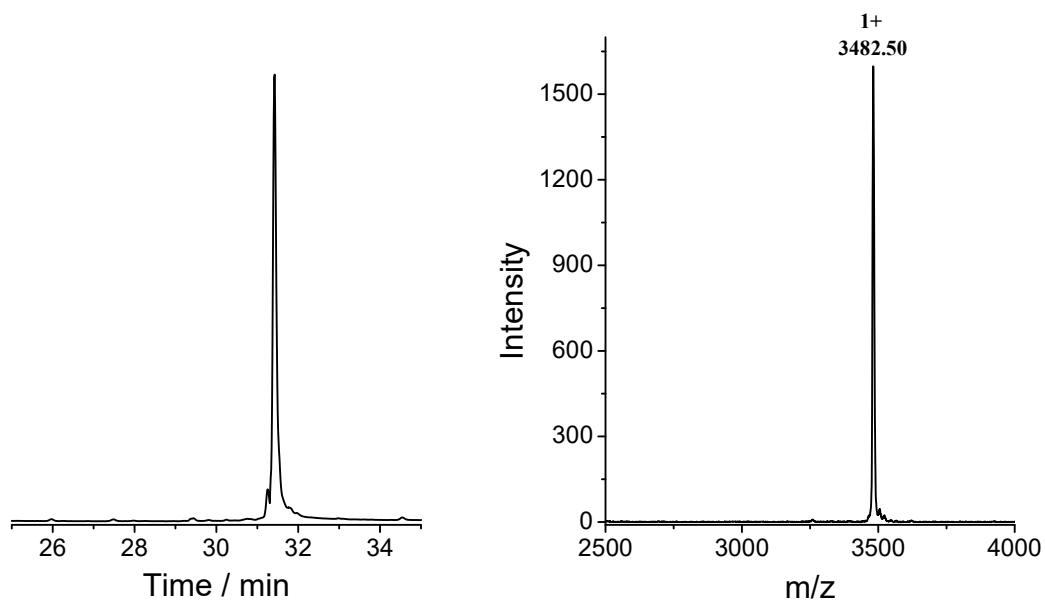

**Figure S14.** Analytical HPLC chromatogram and mass spectrum data of the purified **6-Bme-6**; m/z calculated: 3481.65, m/z found: 3482.50  $[M+H]^+$ .

---

**6-Bph-6**

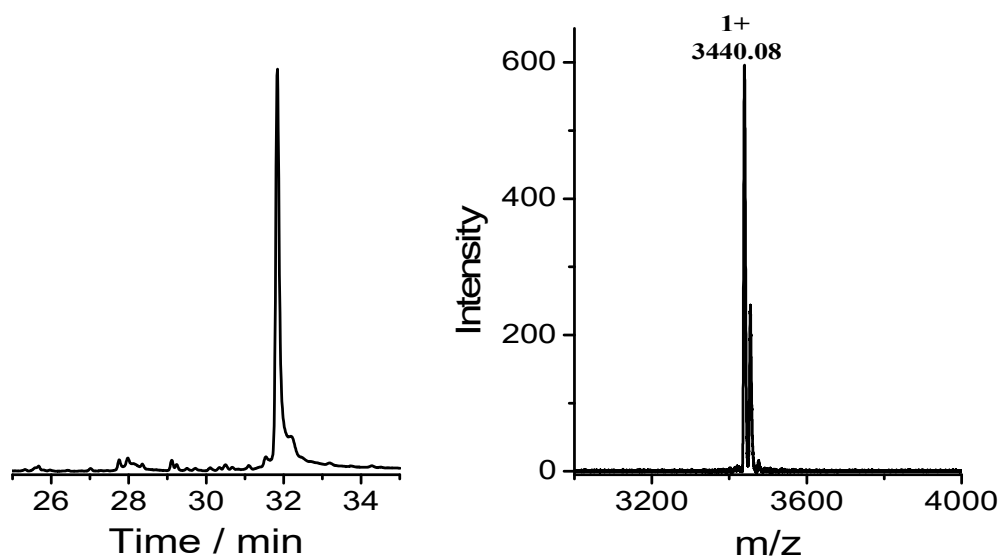

**Figure S15.** Analytical HPLC chromatogram and mass spectrum data of the purified **6-Bph-6**; m/z calculated: 3439.65, m/z found: 3440.08  $[M+H]^+$ .

## Enzymatic digestion of free peptides (1–4) and their NDI conjugates

1:

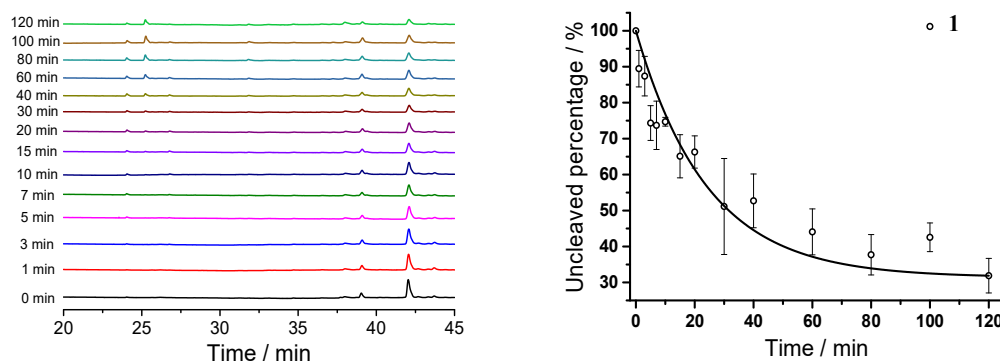

**Figure S16.** Kinetics of peptide digestion by chymotrypsin in 100 mM phosphate buffer, pH 7.4; chymotrypsin concentration: 0.02  $\mu$ M, peptide concentration (1): 50  $\mu$ M. Chromatograms were recorded under 280 nm. Data were presented as mean  $\pm$  s.d. (n = 3).

2:

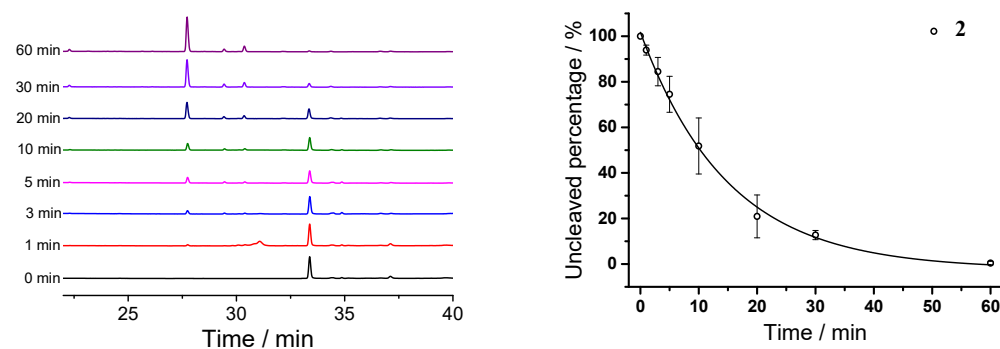

**Figure S17.** Kinetics of peptide digestion by chymotrypsin in 100 mM phosphate buffer, pH 7.4; chymotrypsin concentration: 0.02  $\mu$ M, peptide concentration (2): 50  $\mu$ M. Chromatograms were recorded under 280 nm. Data were presented as mean  $\pm$  s.d. (n = 3).

**1=NDI:**

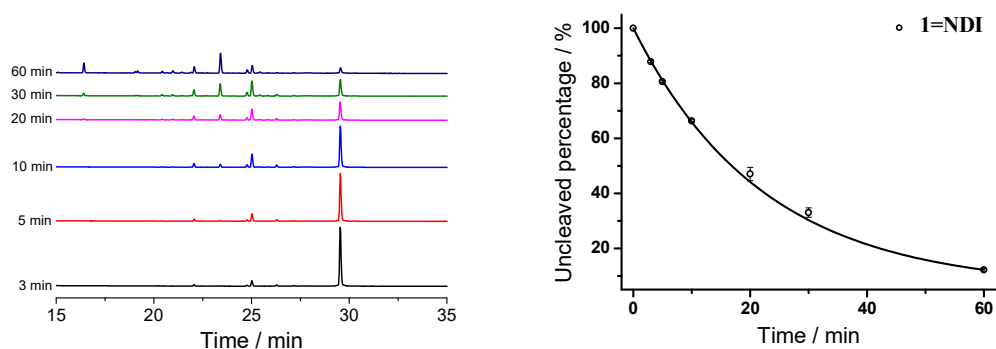

**Figure S18.** Kinetics of peptide digestion by chymotrypsin in 100 mM phosphate buffer, pH 7.4; chymotrypsin concentration: 10  $\mu$ M, peptide concentration (**1=NDI**): 50  $\mu$ M. Chromatograms were recorded under 363 nm. Data were presented as mean  $\pm$  s.d. (n = 3).

**2=NDI:**

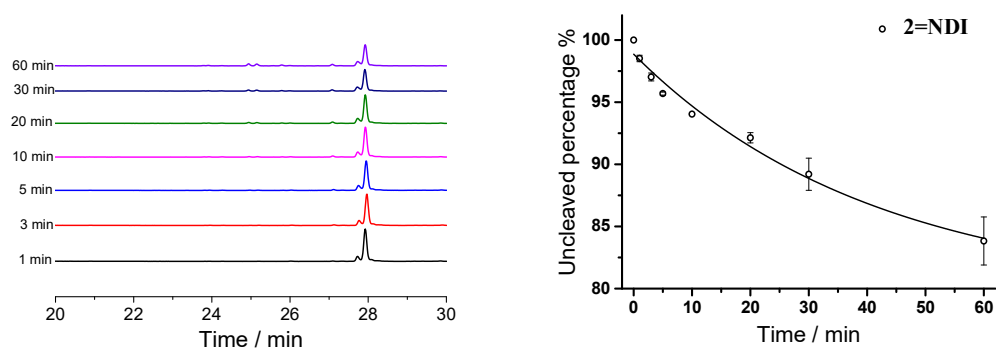

**Figure S19.** Kinetics of peptide digestion by chymotrypsin in 100 mM phosphate buffer, pH 7.4; chymotrypsin concentration: 10  $\mu$ M, peptide concentration (**2=NDI**): 50  $\mu$ M. Chromatograms were recorded under 363 nm. Data were presented as mean  $\pm$  s.d. (n = 2).

3:

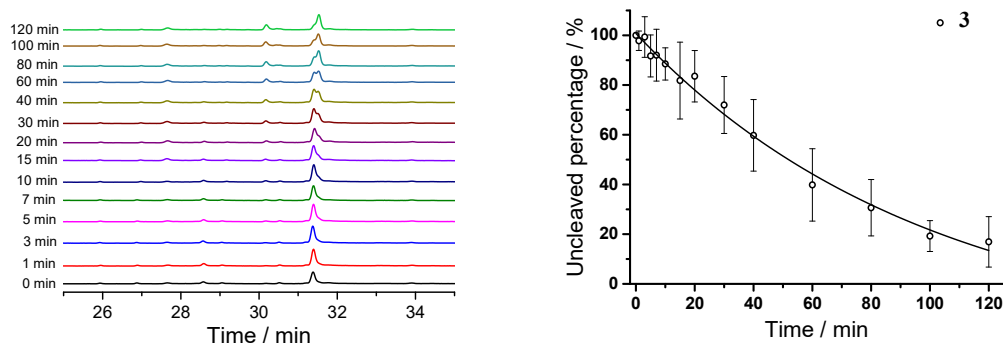

**Figure S20.** Kinetics of peptide digestion by chymotrypsin in 100 mM phosphate buffer, pH 7.4; chymotrypsin concentration: 0.02  $\mu$ M, peptide concentration (**3**): 50  $\mu$ M. Chromatograms were recorded under 280 nm. Data were presented as mean  $\pm$  s.d. (n = 3).

4:

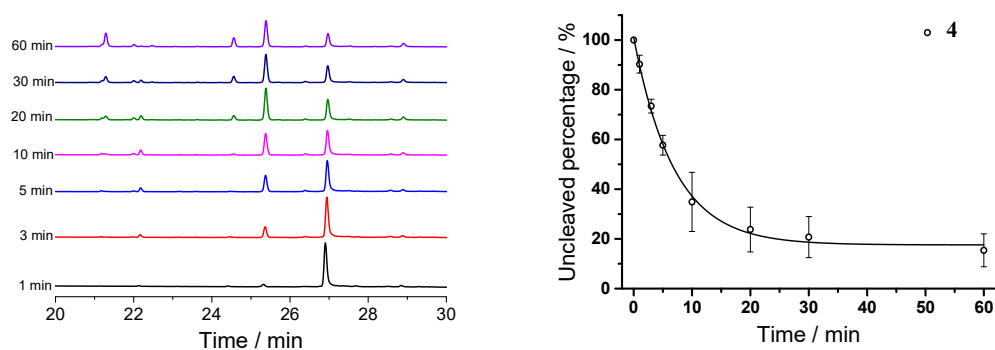

**Figure S21.** Kinetics of peptide digestion by chymotrypsin in 100 mM phosphate buffer, pH 7.4; chymotrypsin concentration: 0.02  $\mu$ M, peptide concentration (**4**): 50  $\mu$ M. Chromatograms were recorded under 280 nm. Data were presented as mean  $\pm$  s.d. (n = 3).

**3=NDI:**

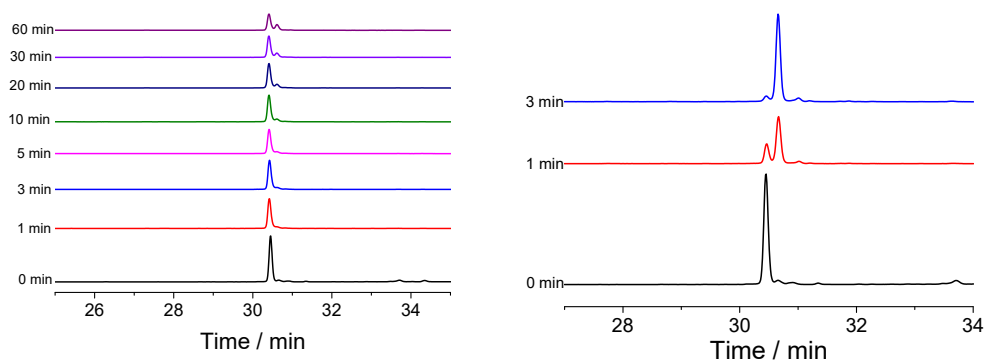

**Figure S22.** Kinetics of peptide digestion by chymotrypsin in 100 mM phosphate buffer, pH 7.4; chymotrypsin concentration: 0.1  $\mu$ M (left) or 10  $\mu$ M (right), peptide concentration (**3=NDI**): 50  $\mu$ M. Chromatograms were recorded under 363 nm.

**4=NDI:**

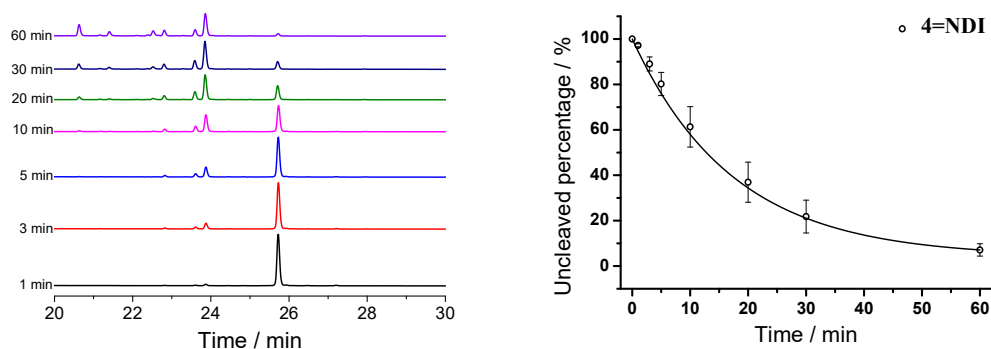

**Figure S23.** Kinetics of peptide digestion by chymotrypsin in 100 mM phosphate buffer, pH 7.4; chymotrypsin concentration: 0.1  $\mu$ M, peptide concentration (**4=NDI**): 50  $\mu$ M. Chromatograms were recorded under 363 nm. Data were presented as mean  $\pm$  s.d. (n = 3).

---

## CD Spectra of free peptides (1–4) and their NDI conjugates

**1** and **1=NDI**:

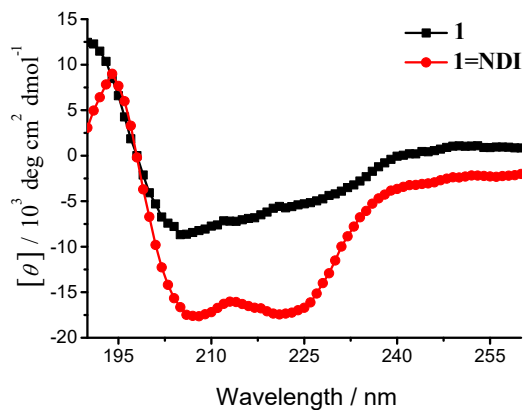

**Figure S24.** CD spectra of **1** and **1=NDI** in phosphate buffer (50 mM, pH 7.4) containing ~12 vol% ACN; concentration: 30  $\mu\text{M}$ .

**2** and **2=NDI**:

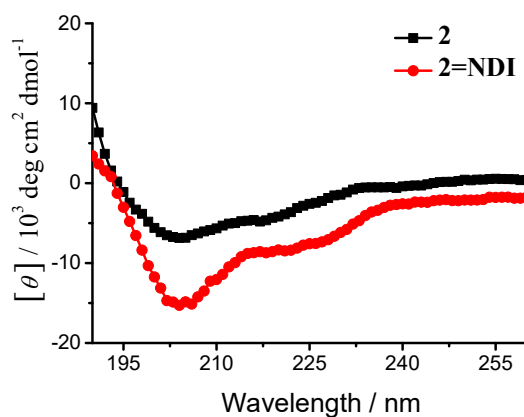

**Figure S25.** CD spectra of **2** and **2=NDI** in phosphate buffer (50 mM, pH 7.4); concentration: 30  $\mu\text{M}$ .

**3** and **3=NDI**:

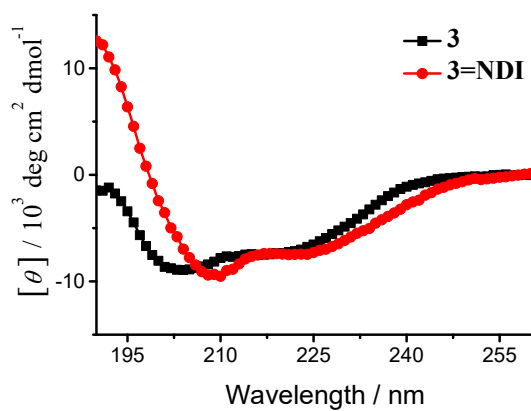

**Figure S26.** CD spectra of **3** and **3=NDI** in phosphate buffer (50 mM, pH 7.4); concentration: 30  $\mu\text{M}$ .

**4** and **4=NDI**:

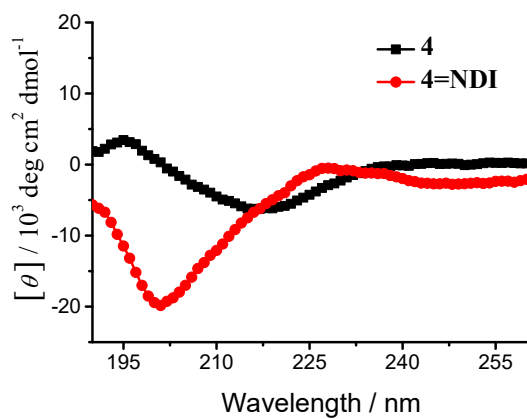

**Figure S27.** CD spectra of **4** and **4=NDI** in phosphate buffer (50 mM, pH 7.4); concentration: 30  $\mu\text{M}$ .



## Enzymatic digestion of free peptides (5–8) and their NDI conjugates

5:

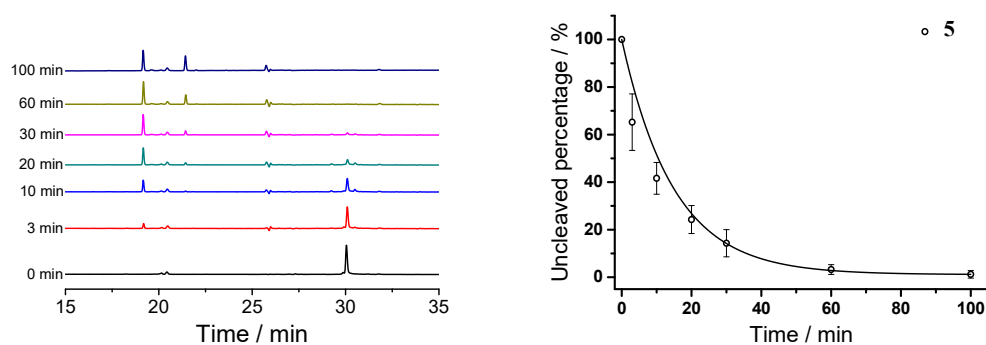

**Figure S28.** Kinetics of peptide digestion by chymotrypsin in 100 mM phosphate buffer, pH 7.4; chymotrypsin concentration: 0.02  $\mu$ M, peptide concentration (**5**): 50  $\mu$ M. Chromatograms were recorded under 280 nm. Data were presented as mean  $\pm$  s.d. (n = 3).

5-NDI:

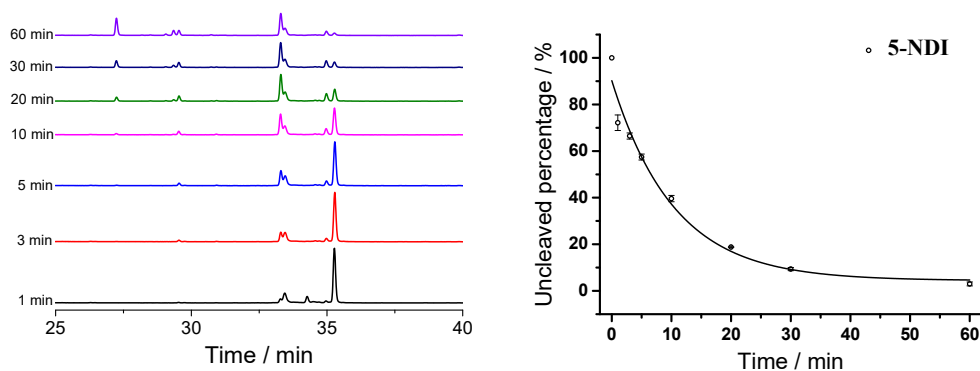

**Figure S29.** Kinetics of peptide digestion by chymotrypsin in 100 mM phosphate buffer, pH 7.4; chymotrypsin concentration: 10  $\mu$ M, peptide concentration (**5-NDI**): 50  $\mu$ M. Chromatograms were recorded under 363 nm. Data were presented as mean  $\pm$  s.d. (n = 3).

### 5-NDI-5:

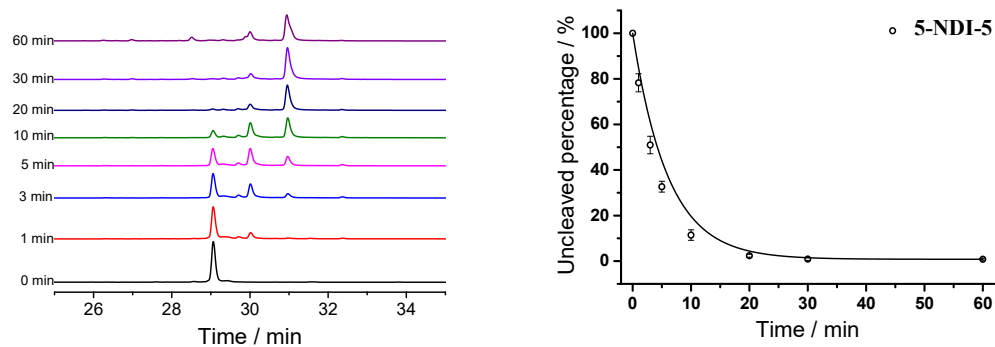

**Figure S30.** Kinetics of peptide digestion by chymotrypsin in 100 mM phosphate buffer, pH 7.4; chymotrypsin concentration: 10  $\mu$ M, peptide concentration (5-NDI-5): 50  $\mu$ M. Chromatograms were recorded under 363 nm. Data were presented as mean  $\pm$  s.d. (n = 3).

6:

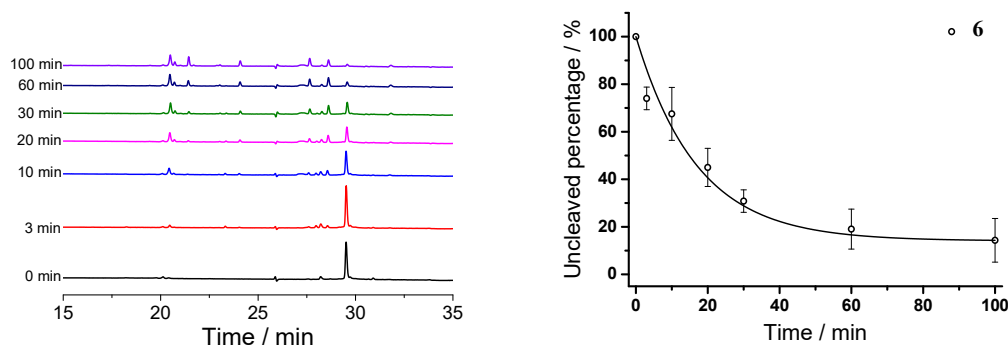

**Figure S31.** Kinetics of peptide digestion by chymotrypsin in 100 mM phosphate buffer, pH 7.4; chymotrypsin concentration: 0.02  $\mu$ M, peptide concentration (**6**): 50  $\mu$ M. Chromatograms were recorded under 280 nm. Data were presented as mean  $\pm$  s.d. (n = 3).

6-NDI:

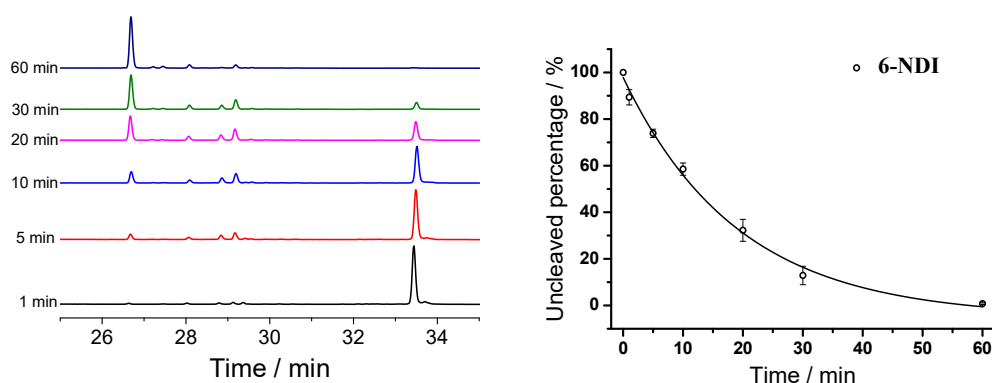

**Figure S32.** Kinetics of peptide digestion by chymotrypsin in 100 mM phosphate buffer, pH 7.4; chymotrypsin concentration: 10  $\mu$ M, peptide concentration (**6-NDI**): 50  $\mu$ M. Chromatograms were recorded under 363 nm. Data were presented as mean  $\pm$  s.d. (n = 3).

### 6-NDI-6:

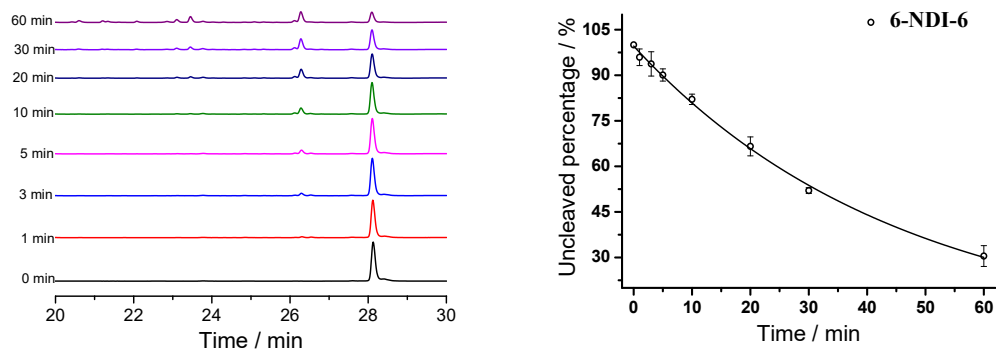

**Figure S33.** Kinetics of peptide digestion by chymotrypsin in 100 mM phosphate buffer, pH 7.4; chymotrypsin concentration: 10  $\mu$ M, peptide concentration (6-NDI-6): 50  $\mu$ M. Chromatograms were recorded under 363 nm. Data were presented as mean  $\pm$  s.d. (n = 3).

7:

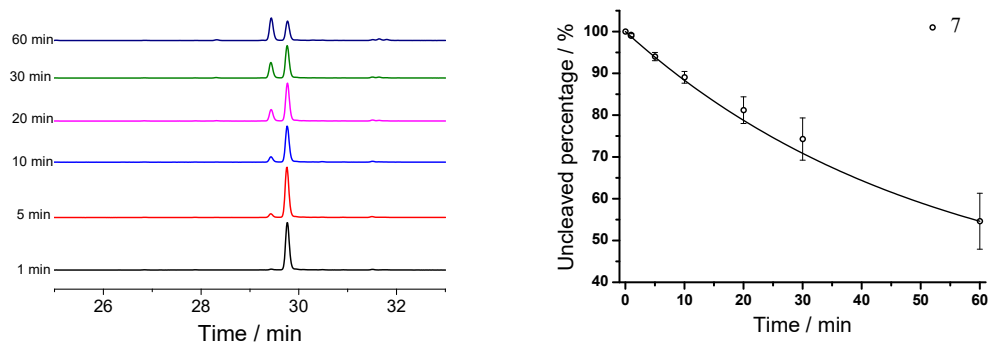

**Figure S34.** Kinetics of peptide digestion by chymotrypsin in 100 mM phosphate buffer, pH 7.4; chymotrypsin concentration: 0.02  $\mu$ M, peptide concentration (7): 50  $\mu$ M. Chromatograms were recorded under 280 nm. Data were presented as mean  $\pm$  s.d. (n = 3).

7-NDI:

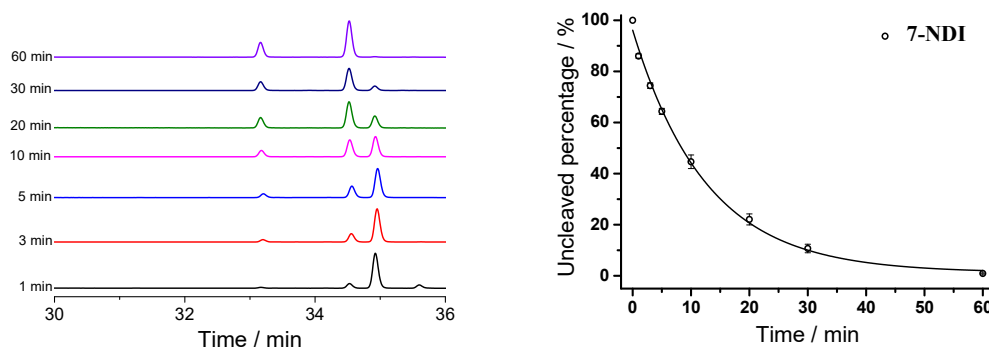

**Figure S35.** Kinetics of peptide digestion by chymotrypsin in 100 mM phosphate buffer, pH 7.4; chymotrypsin concentration: 10  $\mu$ M, peptide concentration (7-NDI): 50  $\mu$ M. Chromatograms were recorded under 363 nm. Data were presented as mean  $\pm$  s.d. (n = 3).

## 7-NDI-7:

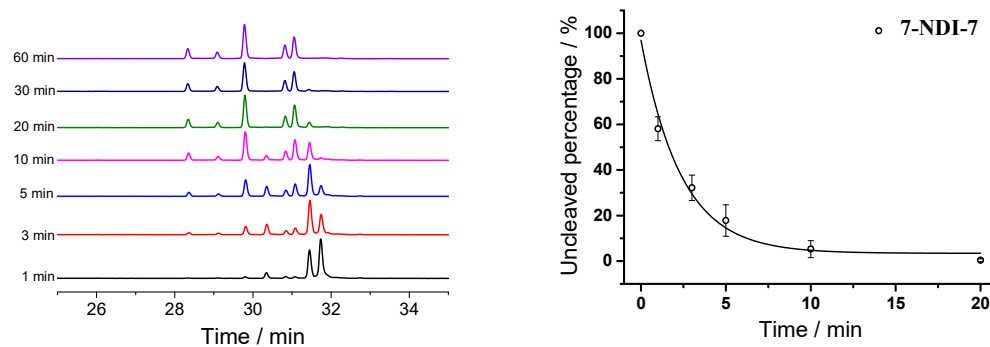

**Figure S36.** Kinetics of peptide digestion by chymotrypsin in 100 mM phosphate buffer, pH 7.4; chymotrypsin concentration: 10  $\mu$ M, peptide concentration (7-NDI-7): 50  $\mu$ M. Chromatograms were recorded under 363 nm. Data were presented as mean  $\pm$  s.d. (n = 3).

8:

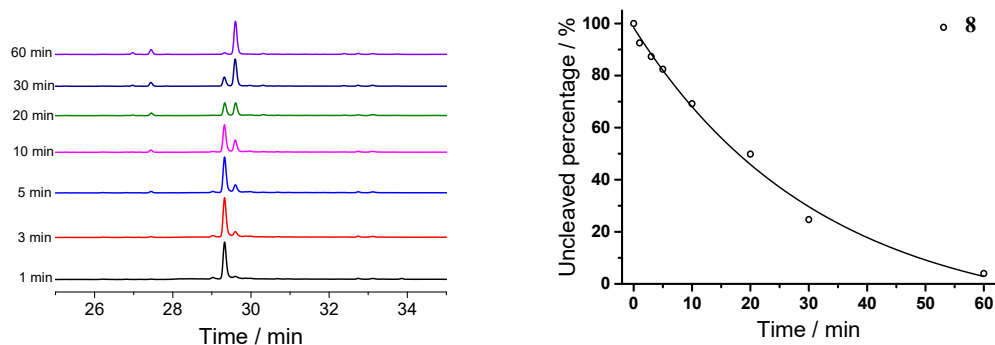

**Figure S37.** Kinetics of peptide digestion by chymotrypsin in 100 mM phosphate buffer, pH 7.4; chymotrypsin concentration: 0.02  $\mu$ M, peptide concentration (8): 50  $\mu$ M. Chromatograms were recorded under 280 nm.

8-NDI:

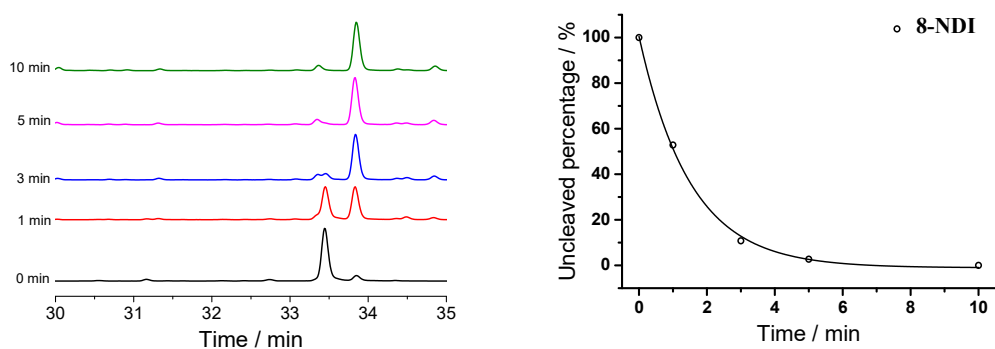

**Figure S38.** Kinetics of peptide digestion by chymotrypsin in 100 mM phosphate buffer, pH 7.4; chymotrypsin concentration: 10  $\mu$ M, peptide concentration (8-NDI): 50  $\mu$ M. Chromatograms were recorded under 363 nm.

## 8-NDI-8:

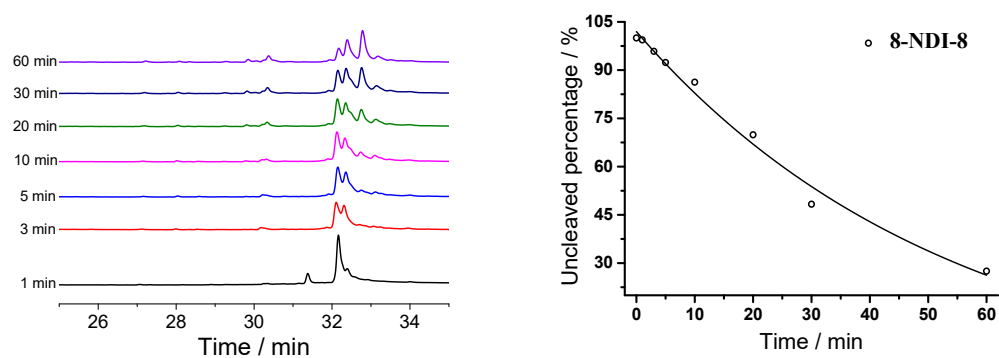

**Figure S39.** Kinetics of peptide digestion by chymotrypsin in 100 mM phosphate buffer, pH 7.4; chymotrypsin concentration: 10  $\mu$ M, peptide concentration (8-NDI-8): 50  $\mu$ M. Chromatograms were recorded under 363 nm.



6:

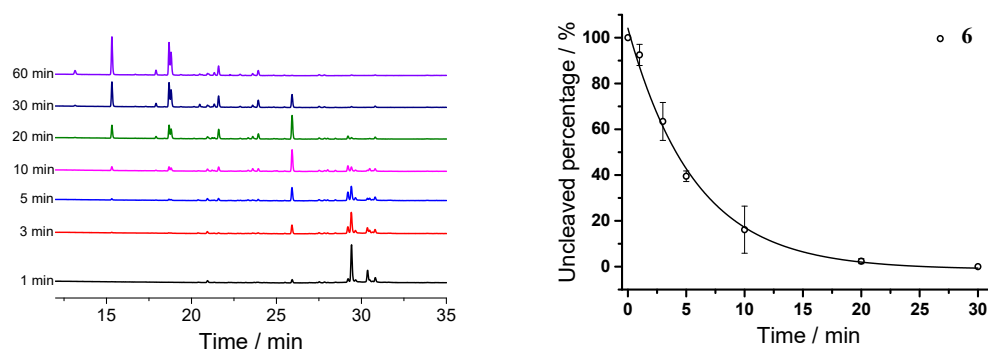

**Figure S40.** Kinetics of peptide digestion by proteinase K in 100 mM phosphate buffer, pH 7.4; proteinase K concentration: 0.01  $\mu$ M, peptide concentration (6): 50  $\mu$ M. Chromatograms were recorded under 280 nm. Data were presented as mean  $\pm$  s.d. (n = 3).

6-NDI-6:

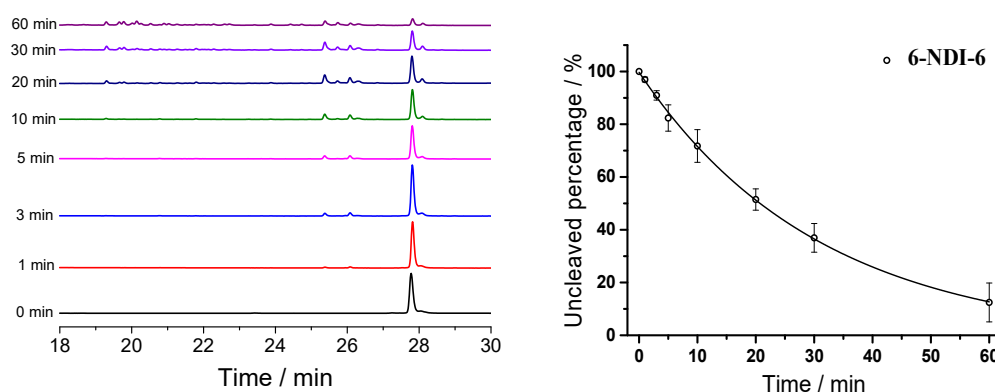

**Figure S41.** Kinetics of peptide digestion by proteinase K in 100 mM phosphate buffer, pH 7.4; proteinase K concentration: 0.1  $\mu$ M, peptide concentration (6-NDI-6): 50  $\mu$ M. Chromatograms were recorded under 363 nm. Data were presented as mean  $\pm$  s.d. (n = 3).

## 6-6

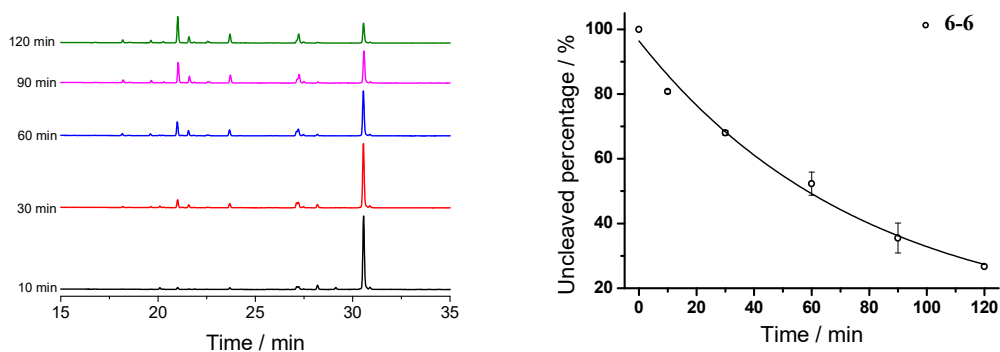

**Figure S42.** Kinetics of peptide digestion by chymotrypsin in 100 mM phosphate buffer, pH 7.4; chymotrypsin concentration: 0.1  $\mu$ M, peptide concentration (**6-6**): 50  $\mu$ M. Chromatograms were recorded under 280 nm. Data were presented as mean  $\pm$  s.d. (n = 3).

## 6-Bme-6

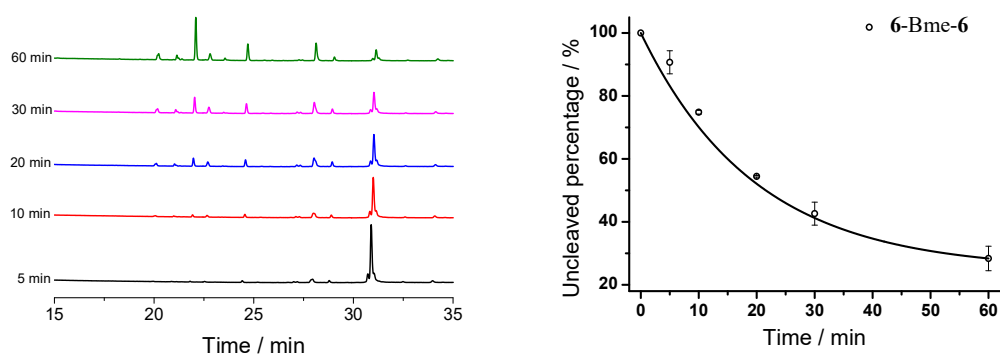

**Figure S43.** Kinetics of peptide digestion by chymotrypsin in 100 mM phosphate buffer, pH 7.4; chymotrypsin concentration: 0.1  $\mu$ M, peptide concentration (**6-Bme-6**): 50  $\mu$ M. Chromatograms were recorded under 280 nm. Data were presented as mean  $\pm$  s.d. (n = 3).

## 6-Bph-6

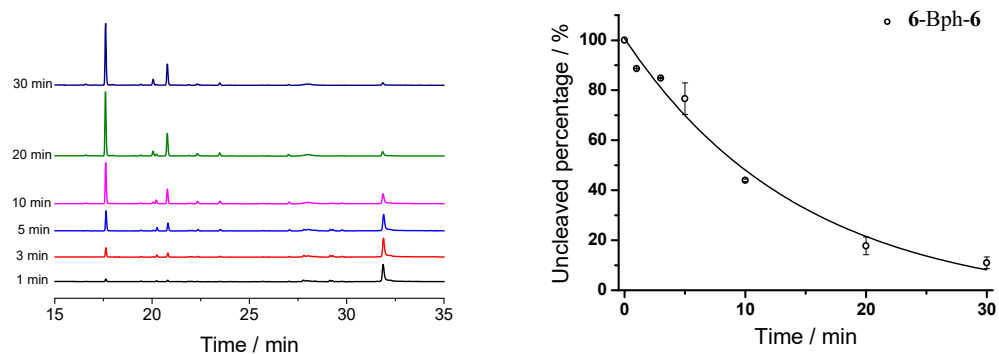

**Figure S44.** Kinetics of peptide digestion by chymotrypsin in 100 mM phosphate buffer, pH 7.4; chymotrypsin concentration: 10  $\mu$ M, peptide concentration (**6-Bph-6**): 50  $\mu$ M. Chromatograms were recorded under 280 nm. Data were presented as mean  $\pm$  s.d. (n = 3).

## HPLC and mass spectrometry (MS) analysis of cleavage sites

6

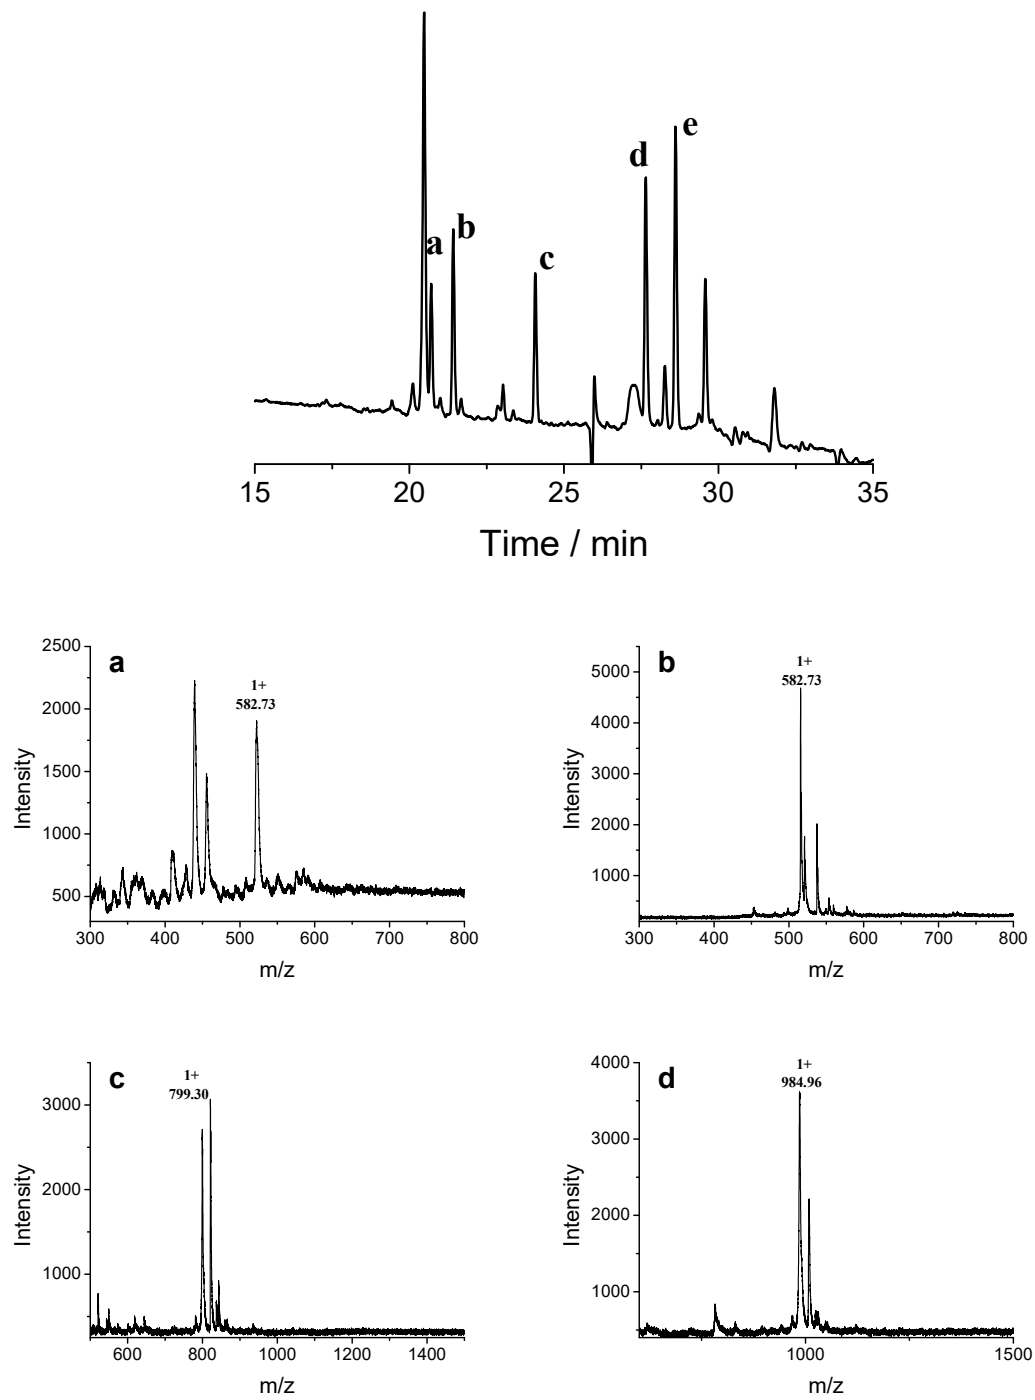

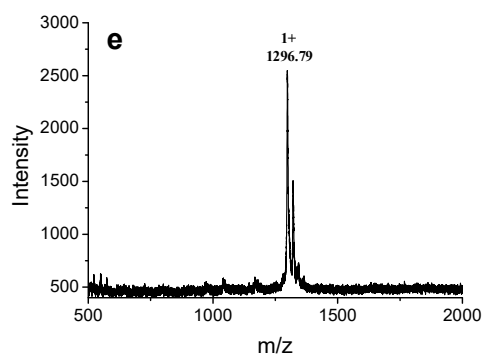

**Figure S45.** Chymotrypsin digestion HPLC and mass spectrometry analysis of **6. 6** was digested with chymotrypsin and purified by HPLC. Then, the isolated fragments were analyzed by mass spectrometry. From top to bottom: Chromatogram of digested sample in UV channel (280 nm), mass spectra of peaks a-e labeled in the chromatograms.

Assignment of the peptide fragments:

| Peak No. | Sequence      | m/z expected | m/z (M+H <sup>+</sup> ) found |
|----------|---------------|--------------|-------------------------------|
| a        | SEYW          | 583.6        | 582.73                        |
| b        | WAQL          | 516.6        | 515.57                        |
| c        | Ac-LTFSEY     | 800.86       | 799.30                        |
| d        | Ac-LTFSEYW    | 987.08       | 984.96                        |
| e        | Ac-LTFSEYWAQL | 1299.45      | 1296.79                       |

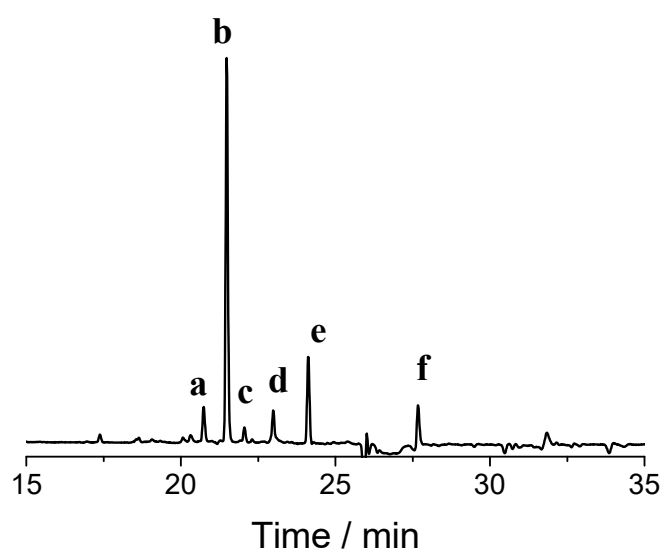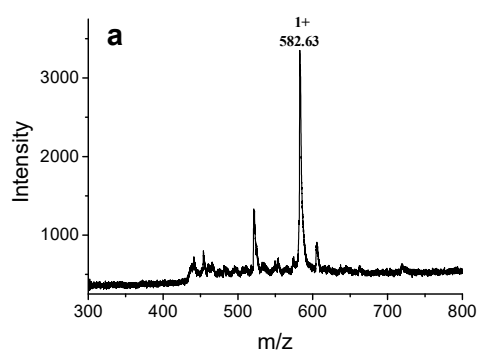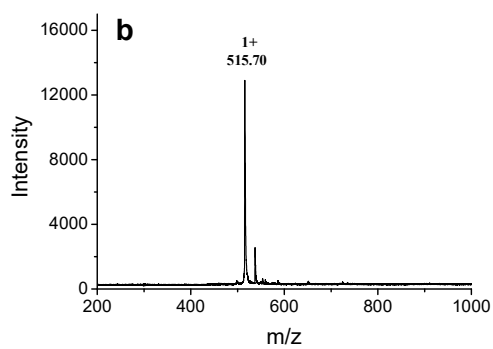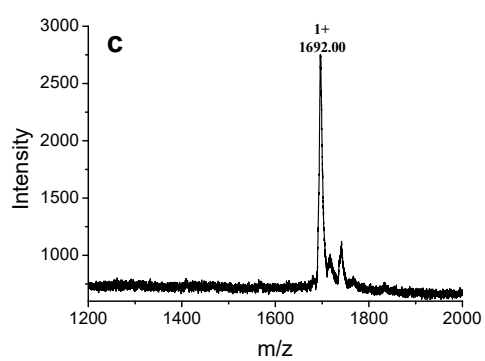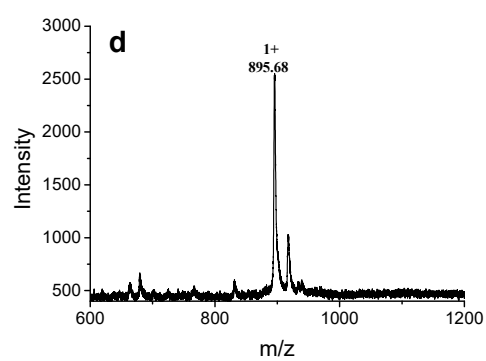

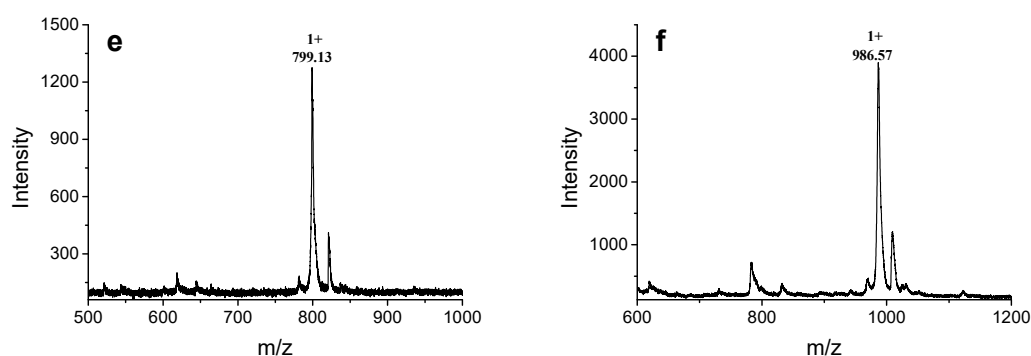

**Figure S46.** Chymotrypsin digestion HPLC and mass spectrometry analysis of **6-6**. **6-6** was digested with chymotrypsin and purified by HPLC. Then, the isolated fragments were analyzed by mass spectrometry. From top to bottom: Chromatogram of digested sample in UV channel (280 nm), mass spectra of peaks a-f labeled in the chromatograms.

Assignment of the peptide fragments:

| Peak No. | Sequence                                             | m/z expected | m/z ( $M+H^+$ ) found |
|----------|------------------------------------------------------|--------------|-----------------------|
| a        | SEYW                                                 | 583.6        | 582.63                |
| b        | WAQL                                                 | 516.6        | 515.70                |
| c        | WAQLCSAA-NH <sub>2</sub><br>WAQLCSAA-NH <sub>2</sub> | 1693.98      | 1692.00               |
| d        | SEYWAQL                                              | 895.97       | 895.68                |
| e        | Ac-LTFSEY                                            | 800.86       | 799.13                |
| f        | Ac-LTFSEYW                                           | 987.08       | 986.57                |

## 6-NDI

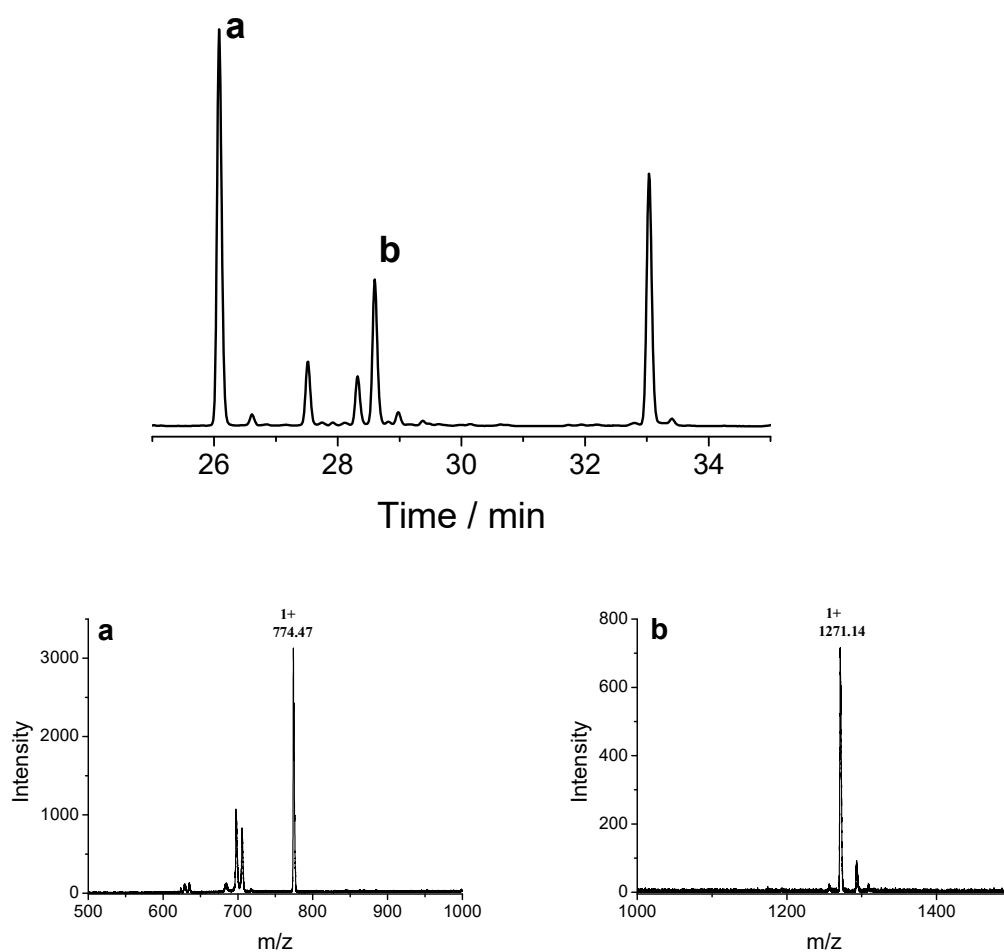

**Figure S47.** Chymotrypsin digestion HPLC and mass spectrometry analysis of **6-NDI**. **6-NDI** was digested with chymotrypsin and purified by HPLC. Then, the isolated fragments were analyzed by mass spectrometry. From top to bottom: Chromatogram of digested sample in UV channel (363 nm), mass spectra of peaks a and b labeled in the chromatograms.

Assignment of the peptide fragments:

| Peak No. | Sequence                        | m/z expected | m/z ( $M+H^+$ ) found |
|----------|---------------------------------|--------------|-----------------------|
| a        | CSAA-NH <sub>2</sub><br>NDI     | 774.8        | 774.47                |
| b        | WAQLCSAA-NH <sub>2</sub><br>NDI | 1272.43      | 1271.14               |



## 6-NDI-6

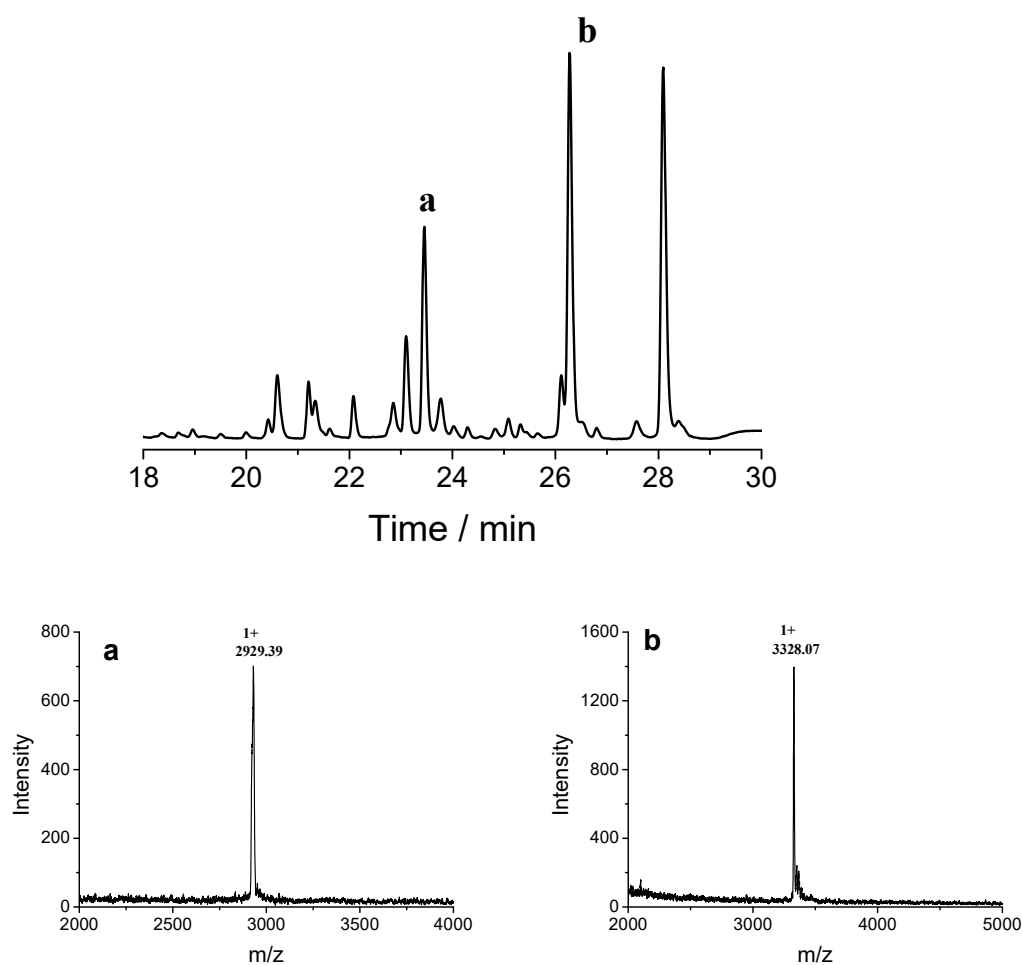

**Figure S48.** Chymotrypsin digestion HPLC and mass spectrometry analysis of **6-NDI-6**. **6-NDI-6** was digested with chymotrypsin and purified by HPLC. Then, the isolated fragments were analyzed by mass spectrometry. From top to bottom: Chromatogram of digested sample in UV channel (363 nm), mass spectra of peaks a and b labeled in the chromatograms.

Assignment of the peptide fragments:

---

| Peak No. | Sequence                                                                | m/z expected | m/z (M+H <sup>+</sup> ) found |
|----------|-------------------------------------------------------------------------|--------------|-------------------------------|
| a        | SEYWAQLCSAA-NH <sub>2</sub><br>NDI<br>SEYWAQLCSAA-NH <sub>2</sub>       | 2929.18      | 2929.39                       |
| b        | Ac-LTFSEYWAQLCSAA-NH <sub>2</sub><br>NDI<br>SEYWAQLCSAA-NH <sub>2</sub> | 3328.62      | 3328.07                       |

---

## Data on HREMD simulations

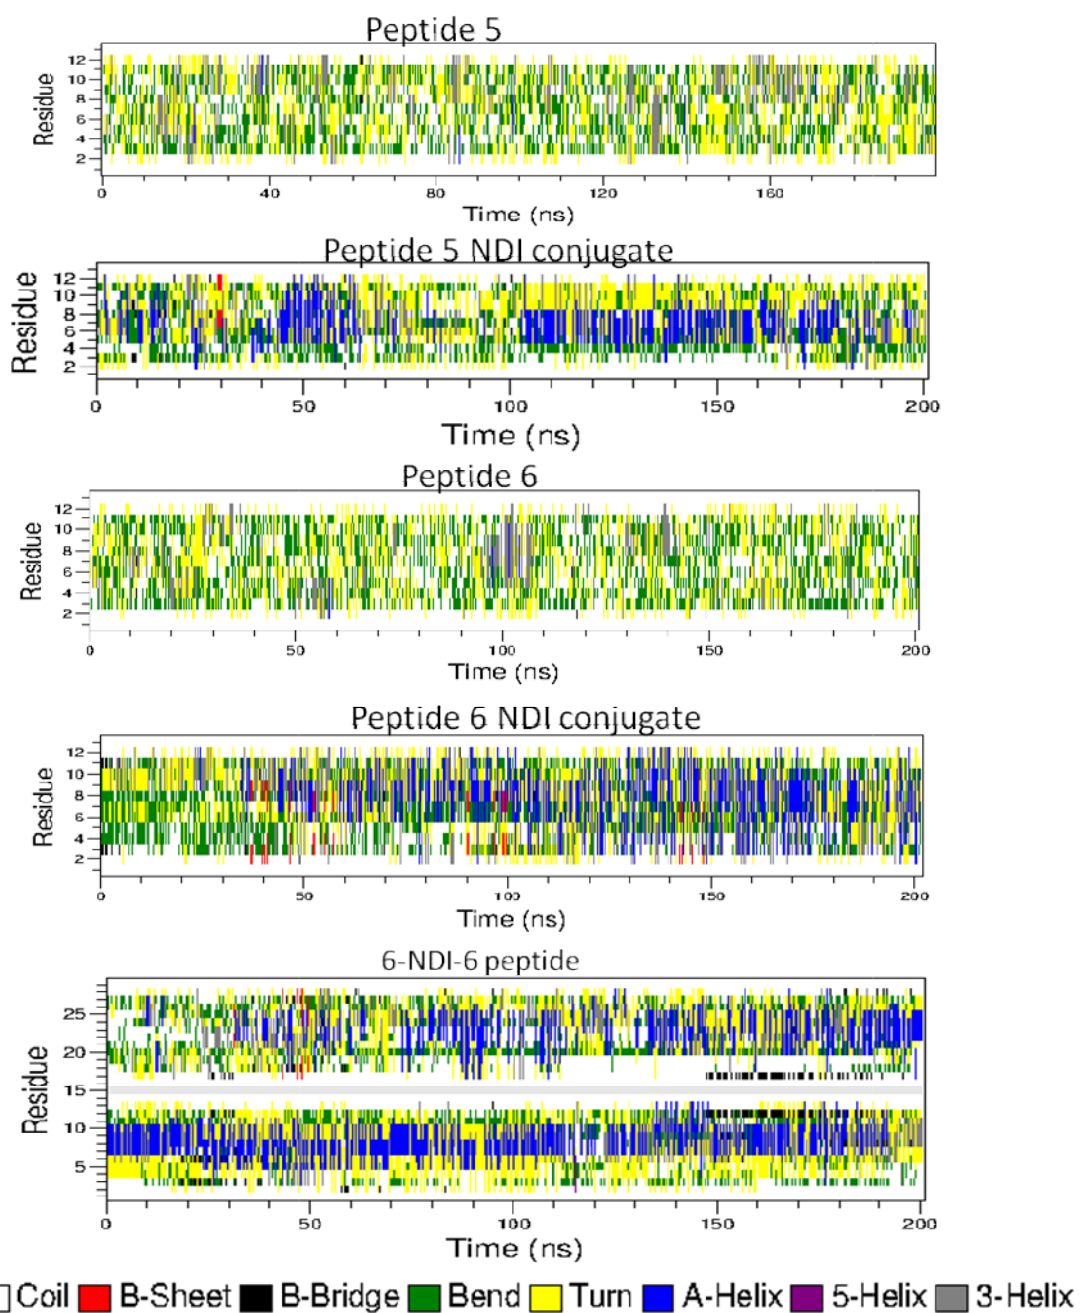

**Figure S49.** Evolution of secondary structures of peptides **5** and **6** and their NDI conjugates.

---

## Data on HREMD simulations

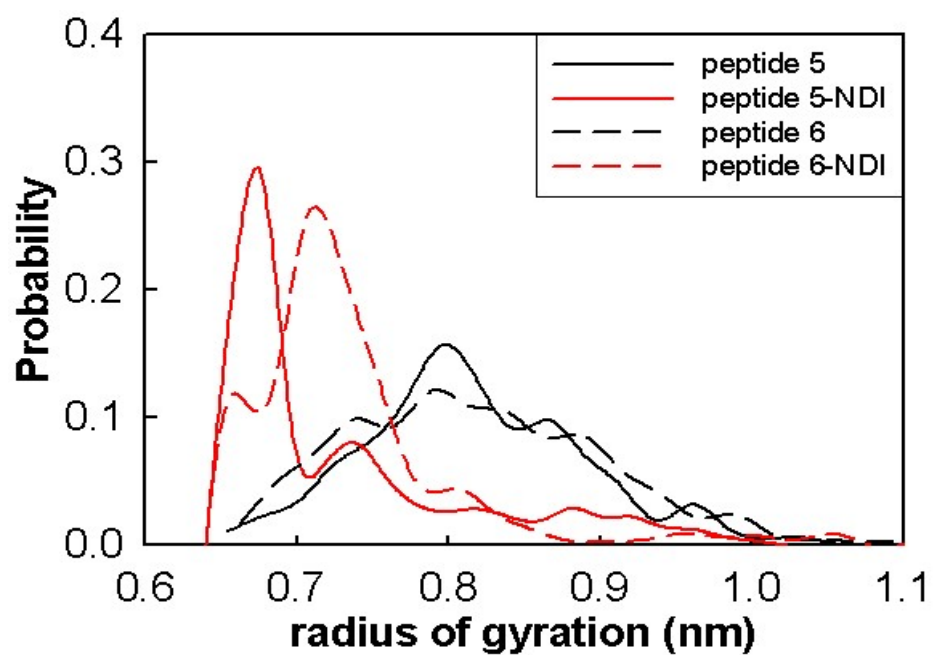

**Figure S50.** Probability distribution of the radius of gyration of peptide **5**, **6** and their NDI conjugates.

---

## CD Spectra of free peptides (5 and 6) and their NDI conjugates

5, 5-NDI and 5-NDI-5:

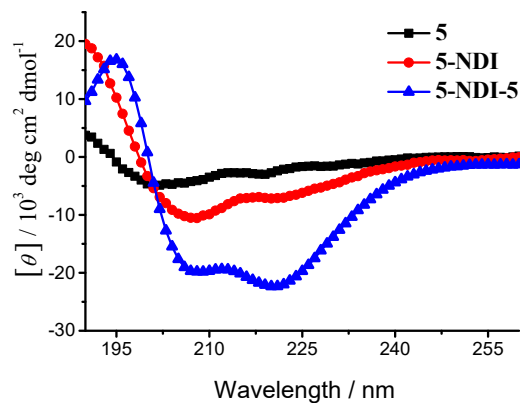

**Figure S51.** CD spectra of 5, 5-NDI and 5-NDI-5 in phosphate buffer (50 mM, pH 7.4) containing ~5 vol% ACN; concentration: 30  $\mu\text{M}$ .

6, 6-NDI and 6-NDI-6:

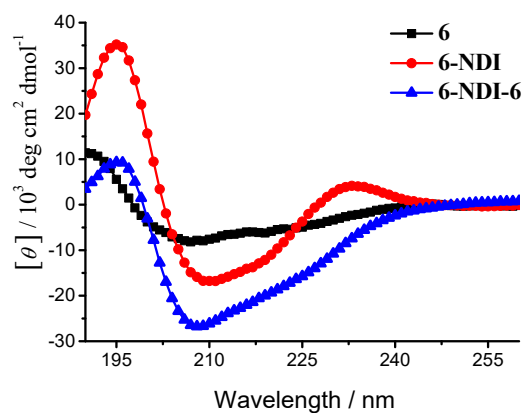

**Figure S52.** CD spectra of 6, 6-NDI and 6-NDI-6 in phosphate buffer (50 mM, pH 7.4) containing ~5 vol% ACN; concentration: 30  $\mu\text{M}$ .

---

## Fluorescence spectra of peptides

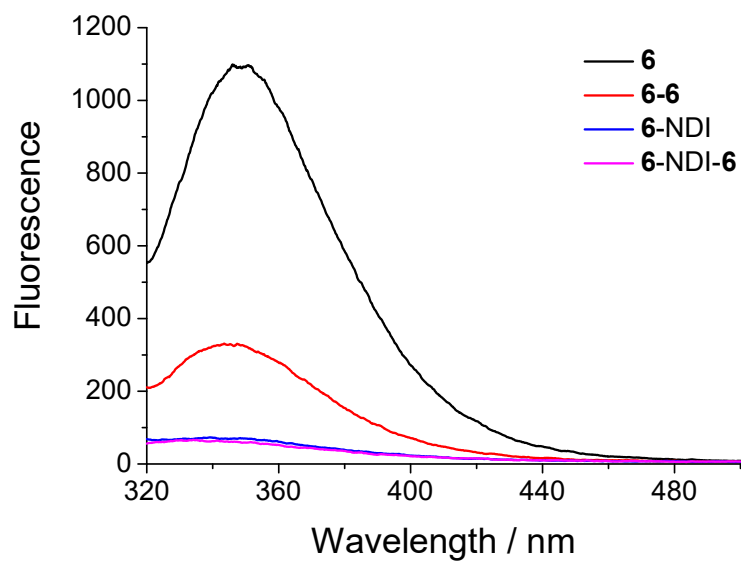

**Figure S53.** Fluorescence emission spectra of **6** (1.4  $\mu\text{M}$ ), **6-6** (0.7  $\mu\text{M}$ ), **6-NDI** (1.4  $\mu\text{M}$ ), and **6-NDI-6** (0.7  $\mu\text{M}$ ) in 10 mm phosphate buffer; excitation wavelength: 280 nm.

## Reduction kinetics of NDI-peptide conjugates in redox buffers

### 5-NDI:

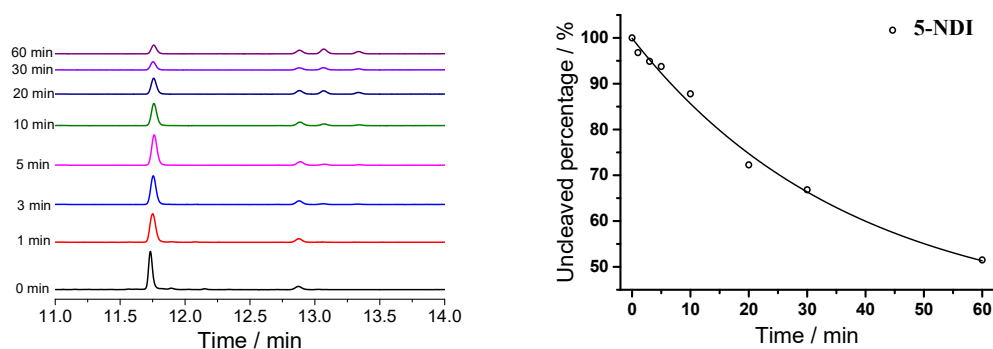

**Figure S54.** Kinetics of reduction of 5-NDI in 10 mM DTT buffer (100 mM phosphate buffer, pH 7.4); concentration of 5-NDI: 50  $\mu$ M, chromatograms were recorded under 363 nm.

### 6-NDI-6:

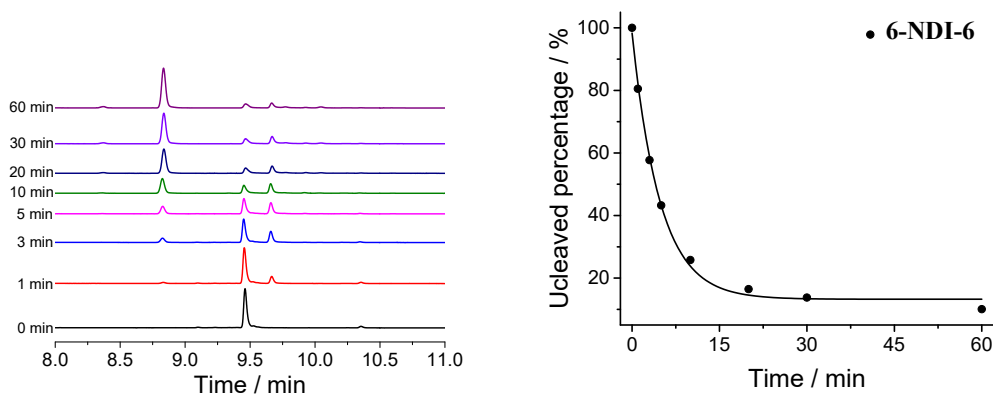

**Figure S55.** Kinetics of reduction of 6-NDI-6 in 10 mM DTT buffer (100 mM phosphate buffer, pH 7.4); concentration of 6-NDI-6: 50  $\mu$ M, chromatograms were recorded under 363 nm.

---

To confirm the reduction of disulfide bonds of 6-NDI-6 in cells:

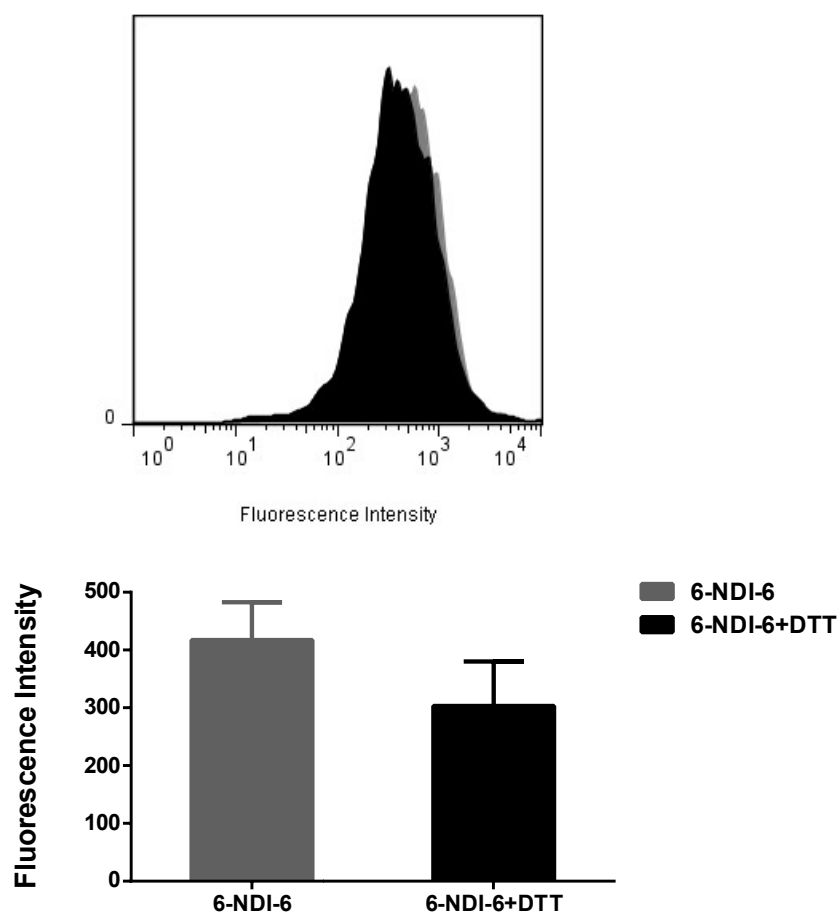

**Figure S56.** Flow cytometric analysis of MCF7 cells incubated with 1.0  $\mu$ M 6-NDI-6. Mean fluorescence intensities were presented as mean  $\pm$  s.d. ( $n = 3$ ). MCF7 cells were first incubated with 1.0  $\mu$ M 6-NDI-6 for 24 h. After that, the medium was removed and 2 mM DTT was added. After  $\sim$ 10 min, the supernatant was removed and the cells were collected and analyzed by a Flow Cytometry.



---

### Bioactivity of peptide and NDI-peptide conjugates in 10% serum

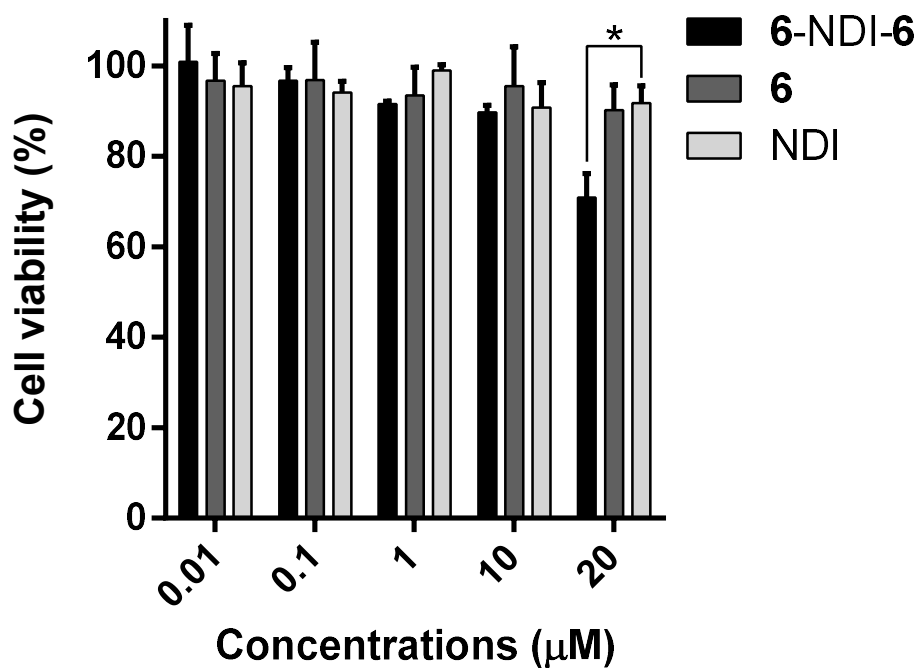

**Figure S57.** Viability of MCF7 cells determined using MTT assays. Cells were incubated with various concentrations of 6-NDI-6 (or 6 and NDI) in 10% FBS-containing medium for 24 h. Results are expressed as mean  $\pm$  s.d. ( $n = 3$ ). Single star denotes statistically significant differences in a t-test ( $P < 0.05$ ).
